# Supplementary material for: The immune and metabolic changes with age in giant panda blood by combined transcriptome and DNA methylation analysis
Source: publisher site journal article supplement (doi:10.18632/aging.103990), 2020-11-07
Supplement: Supplementary file [file aging-v12i21-103990-supplementary-material-SD4.pdf]

## SUPPLEMENTARY TABLE

Supplementary Table 7. Differentially expressed and differentially methylated genes in each group.

| Young vs. Adult | Adult vs. Old | Young vs. Old       |
|-----------------|---------------|---------------------|
| <i>COL24A1</i>  | <i>NME4</i>   | <i>NCAPH</i>        |
| <i>SHISA8</i>   |               | <i>COL24A1</i>      |
| <i>MVB12B</i>   |               | <i>TEX30</i>        |
|                 |               | <i>ADAM28</i>       |
|                 |               | <i>F13A1</i>        |
|                 |               | <i>S100A6</i>       |
|                 |               | <i>SOCS1</i>        |
|                 |               | <i>TFPI2</i>        |
|                 |               | <i>PPP1R14A</i>     |
|                 |               | <i>ULK4</i>         |
|                 |               | <i>ZNF704</i>       |
|                 |               | <i>LPAR6</i>        |
|                 |               | <i>WNK2</i>         |
|                 |               | <i>KIF12</i>        |
|                 |               | <i>PER1</i>         |
|                 |               | <i>CD68</i>         |
|                 |               | <i>PLA2G16</i>      |
|                 |               | <i>RTN2</i>         |
|                 |               | <i>KLHL14</i>       |
|                 |               | <i>TCF7</i>         |
|                 |               | <i>ZFHX2</i>        |
|                 |               | <i>ISG15</i>        |
|                 |               | <i>PROB1</i>        |
|                 |               | <i>BACH2</i>        |
|                 |               | <i>CREB3L1</i>      |
|                 |               | <i>DNAH11</i>       |
|                 |               | <i>VWF</i>          |
|                 |               | <i>TNS2</i>         |
|                 |               | <i>LOC100472228</i> |
|                 |               | <i>LOC100463922</i> |
|                 |               | <i>RALGPS2</i>      |
|                 |               | <i>CUNH17orf99</i>  |
|                 |               | <i>LOC100483371</i> |
|                 |               | <i>PDZD2</i>        |
|                 |               | <i>TSGA10</i>       |
|                 |               | <i>GAP43</i>        |
